# Supplementary material
Source: PubMed Central journal article supplement (PMC4020577)
Supplement: NIHMS570096-supplement-Suppl_Table.pdf [file NIHMS570096-supplement-Suppl_Table.pdf]

***Supplementary tables for:***

**Breast cancer cells produce tenascin-C as a metastatic niche component to colonize the lungs**

Thordur Oskarsson<sup>1</sup>, Swarnali Acharyya<sup>1</sup>, Xiang H.-F. Zhang<sup>1</sup>, Sakari Vanharanta<sup>1</sup>,  
Sohail F. Tavazoie<sup>1,7</sup>, Patrick G. Morris<sup>2</sup>, Robert J. Downey<sup>3</sup>, Katia Manova-Todorova<sup>4</sup>, Edi  
Brogi<sup>5</sup> and Joan Massagué<sup>1,6</sup>

<sup>1</sup> Cancer Biology and Genetics Program

<sup>2</sup> Department of Medicine

<sup>3</sup> Department of Surgery

<sup>4</sup> Molecular Cytology Core Facility

<sup>5</sup> Department of Pathology

<sup>6</sup> Howard Hughes Medical Institute

Memorial Sloan-Kettering Cancer Center, New York, New York 10065, USA

<sup>7</sup> Present address: The Rockefeller University, New York, New York 10065, USA

Correspondence: Joan Massagué

Box 116, Cancer Biology and Genetics

Memorial Sloan-Kettering Cancer Center

1275 York Avenue, New York, NY 10065 USA

Phone: 646-888-2044

Email: massaguj@mskcc.org

**Supplementary Table 1: TNC binding receptors expressed in CN34 and MDA231 breast cancer cells.**

| TNC binding receptors |                             | Cell lines |        |
|-----------------------|-----------------------------|------------|--------|
|                       |                             | CN34       | MDA231 |
| ANXA2                 | Annexin II                  | +          | +      |
| CD3                   | T-cell surface glycoprotein | -          | -      |
| CNTN1                 | Contactin 1                 | -          | -      |
| EGFR                  | EGF receptor                | +          | +      |
| GPC1                  | Glypican 1                  | +/-        | +      |
| ITGA2                 | Integrin $\alpha$ 2         | +          | +      |
| ITGA7                 | Integrin $\alpha$ 7         | -          | -      |
| ITGA8                 | Integrin $\alpha$ 8         | -          | -      |
| ITGA9                 | Integrin $\alpha$ 9         | -          | -      |
| ITGAV                 | Integrin $\alpha$ V         | +          | +      |
| PITGB1                | Integrin $\beta$ 1          | +          | +      |
| ITGB3                 | Integrin $\beta$ 3          | +          | +      |
| ITGB6                 | Integrin $\beta$ 6          | -          | -      |
| PTPRZ1                | Phosphacan                  | +          | +      |
| SCN11A                | Sodium channel, XI $\alpha$ | +          | +      |
| SDC4                  | Syndecan 4                  | +          | +      |
| TLR4                  | Toll-like receptor 4        | +          | +      |

Microarray expression data (Affymetrix chip HG-U133A) was used to determine the presence or absence of TNC binding receptors in the cell lines CN34 and MDA231.

**Supplementary Table 2: STAT5 Signature: Upregulated genes.**

|    | Probe       | Gene Symbol |    | Probe       | Gene Symbol |
|----|-------------|-------------|----|-------------|-------------|
| 1  | 200069_at   | SART3       | 46 | 204035_at   | SCG2        |
| 2  | 200712_s_at | MAPRE1      | 47 | 204401_at   | KCNN4       |
| 3  | 200713_s_at | MAPRE1      | 48 | 204444_at   | KIF11       |
| 4  | 200783_s_at | STMN1       | 49 | 204456_s_at | GAS1        |
| 5  | 201042_at   | TGM2        | 50 | 204457_s_at | GAS1        |
| 6  | 201275_at   | FDPS        | 51 | 204531_s_at | BRCA1       |
| 7  | 201286_at   | SDC1        | 52 | 204603_at   | EXO1        |
| 8  | 201287_s_at | SDC1        | 53 | 204614_at   | SERPINB2    |
| 9  | 201615_x_at | CALD1       | 54 | 204775_at   | CHAF1B      |
| 10 | 201616_s_at | CALD1       | 55 | 204822_at   | TTK         |
| 11 | 201617_x_at | CALD1       | 56 | 204825_at   | MELK        |
| 12 | 201631_s_at | IER3        | 57 | 204826_at   | CCNF        |
| 13 | 201666_at   | TIMP1       | 58 | 204827_s_at | CCNF        |
| 14 | 201746_at   | TP53        | 59 | 204973_at   | GJB1        |
| 15 | 201896_s_at | PSRC1       | 60 | 205023_at   | RAD51       |
| 16 | 202022_at   | ALDOC       | 61 | 205024_s_at | RAD51       |
| 17 | 202071_at   | SDC4        | 62 | 205044_at   | GABRP       |
| 18 | 202094_at   | BIRC5       | 63 | 205167_s_at | CDC25C      |
| 19 | 202095_s_at | BIRC5       | 64 | 205278_at   | GAD1        |
| 20 | 202183_s_at | KIF22       | 65 | 205309_at   | SMPDL3B     |
| 21 | 202240_at   | PLK1        | 66 | 205339_at   | STIL        |
| 22 | 202245_at   | LSS         | 67 | 205470_s_at | KLK11       |
| 23 | 202310_s_at | COL1A1      | 68 | 205479_s_at | PLAU        |
| 24 | 202311_s_at | COL1A1      | 69 | 205525_at   | CALD1       |
| 25 | 202312_s_at | COL1A1      | 70 | 205566_at   | ABHD2       |
| 26 | 202580_x_at | FOXM1       | 71 | 205646_s_at | PAX6        |
| 27 | 202589_at   | TYMS        | 72 | 205747_at   | CBLN1       |
| 28 | 202627_s_at | SERPINE1    | 73 | 205959_at   | MMP13       |
| 29 | 202628_s_at | SERPINE1    | 74 | 206103_at   | RAC3        |
| 30 | 202705_at   | CCNB2       | 75 | 206154_at   | RLBP1       |
| 31 | 202712_s_at | NA          | 76 | 206177_s_at | ARG1        |
| 32 | 202718_at   | IGFBP2      | 77 | 206315_at   | CRLF1       |
| 33 | 202786_at   | STK39       | 78 | 206483_at   | LRRC6       |
| 34 | 202831_at   | GPX2        | 79 | 206669_at   | GAD1        |
| 35 | 202935_s_at | SOX9        | 80 | 206670_s_at | GAD1        |
| 36 | 202936_s_at | SOX9        | 81 | 206738_at   | APOC4       |
| 37 | 202954_at   | UBE2C       | 82 | 206852_at   | EPHA7       |
| 38 | 203145_at   | SPAG5       | 83 | 206888_s_at | ARHGDI3     |
| 39 | 203213_at   | CDC2        | 84 | 206889_at   | NA          |
| 40 | 203214_x_at | CDC2        | 85 | 206947_at   | B3GALT5     |
| 41 | 203418_at   | CCNA2       | 86 | 207165_at   | HMMR        |
| 42 | 203764_at   | DLGAP5      | 87 | 207331_at   | CENPF       |
| 43 | 203805_s_at | FANCA       | 88 | 207828_s_at | CENPF       |
| 44 | 203806_s_at | FANCA       | 89 | 208175_s_at | DMP1        |
| 45 | 203892_at   | WFDC2       | 90 | 208190_s_at | LSR         |

|     |             |        |     |             |         |
|-----|-------------|--------|-----|-------------|---------|
| 91  | 208358_s_at | UGT8   | 139 | 214880_x_at | CALD1   |
| 92  | 208501_at   | GFI1B  | 140 | 215198_s_at | CALD1   |
| 93  | 208711_s_at | CCND1  | 141 | 215199_at   | CALD1   |
| 94  | 208712_at   | CCND1  | 142 | 215530_at   | FANCA   |
| 95  | 208949_s_at | LGALS3 | 143 | 215591_at   | SATB2   |
| 96  | 209127_s_at | SART3  | 144 | 215808_at   | KLK10   |
| 97  | 209128_s_at | SART3  | 145 | 216009_at   | SLC39A9 |
| 98  | 209172_s_at | CENPF  | 146 | 216011_at   | SLC39A9 |
| 99  | 209280_at   | MRC2   | 147 | 216180_s_at | SYNJ2   |
| 100 | 209408_at   | KIF2C  | 148 | 216181_at   | SYNJ2   |
| 101 | 209514_s_at | RAB27A | 149 | 216182_at   | SYNJ2   |
| 102 | 209515_s_at | RAB27A | 150 | 216183_at   | TGM2    |
| 103 | 209516_at   | SMYD5  | 151 | 216275_at   | BUB1    |
| 104 | 209642_at   | BUB1   | 152 | 216277_at   | BUB1    |
| 105 | 209709_s_at | HMMR   | 153 | 216708_x_at | IGL@    |
| 106 | 209792_s_at | KLK10  | 154 | 216914_at   | CDC25C  |
| 107 | 209891_at   | SPC25  | 155 | 216969_s_at | KIF22   |
| 108 | 209906_at   | C3AR1  | 156 | 216984_x_at | NA      |
| 109 | 210052_s_at | TPX2   | 157 | 217010_s_at | CDC25C  |
| 110 | 210138_at   | RGS20  | 158 | 217067_s_at | DMP1    |
| 111 | 210151_s_at | DYRK3  | 159 | 217344_at   | FDPS    |
| 112 | 210221_at   | CHRNA3 | 160 | 217430_x_at | COL1A1  |
| 113 | 210334_x_at | BIRC5  | 161 | 217435_x_at | NA      |
| 114 | 210559_s_at | CDC2   | 162 | 217640_x_at | SKA1    |
| 115 | 210612_s_at | SYNJ2  | 163 | 217684_at   | TYMS    |
| 116 | 210951_x_at | RAB27A | 164 | 217690_at   | NA      |
| 117 | 211003_x_at | TGM2   | 165 | 217714_x_at | STMN1   |
| 118 | 211018_at   | LSS    | 166 | 217744_s_at | PERP    |
| 119 | 211019_s_at | LSS    | 167 | 217789_at   | SNX6    |
| 120 | 211062_s_at | CPZ    | 168 | 217859_s_at | SLC39A9 |
| 121 | 211300_s_at | TP53   | 169 | 217875_s_at | PMEPA1  |
| 122 | 211519_s_at | KIF2C  | 170 | 218009_s_at | PRC1    |
| 123 | 211573_x_at | TGM2   | 171 | 218039_at   | NUSAP1  |
| 124 | 211587_x_at | CHRNA3 | 172 | 218162_at   | OLFML3  |
| 125 | 211668_s_at | PLAU   | 173 | 218182_s_at | CLDN1   |
| 126 | 211772_x_at | CHRNA3 | 174 | 218252_at   | CKAP2   |
| 127 | 211851_x_at | BRCA1  | 175 | 218259_at   | MKL2    |
| 128 | 212077_at   | CALD1  | 176 | 218324_s_at | SPATS2  |
| 129 | 212828_at   | SYNJ2  | 177 | 218498_s_at | ERO1L   |
| 130 | 212949_at   | NCAPH  | 178 | 218585_s_at | DTL     |
| 131 | 213226_at   | CCNA2  | 179 | 218677_at   | S100A14 |
| 132 | 213240_s_at | KRT4   | 180 | 218755_at   | KIF20A  |
| 133 | 213260_at   | FOXC1  | 181 | 218851_s_at | WDR33   |
| 134 | 213435_at   | SATB2  | 182 | 219143_s_at | RPP25   |
| 135 | 213645_at   | ENOSF1 | 183 | 219232_s_at | EGLN3   |
| 136 | 214019_at   | NA     | 184 | 219257_s_at | SPHK1   |
| 137 | 214148_at   | NA     | 185 | 219415_at   | TTYH1   |
| 138 | 214399_s_at | KRT4   | 186 | 219493_at   | SHCBP1  |

|     |             |         |     |             |        |
|-----|-------------|---------|-----|-------------|--------|
| 187 | 219725_at   | TREM2   | 198 | 220585_at   | HKDC1  |
| 188 | 219755_at   | CBX8    | 199 | 220689_at   | NODAL  |
| 189 | 219756_s_at | POF1B   | 200 | 220997_s_at | DIAPH3 |
| 190 | 219787_s_at | ECT2    | 201 | 221436_s_at | CDCA3  |
| 191 | 219795_at   | SLC6A14 | 202 | 221560_at   | MARK4  |
| 192 | 219978_s_at | NUSAP1  | 203 | 221815_at   | ABHD2  |
| 193 | 220224_at   | HAO1    | 204 | 222294_s_at | RAB27A |
| 194 | 220295_x_at | DEPDC1  | 205 | 37408_at    | MRC2   |
| 195 | 220370_s_at | USP36   | 206 | 55065_at    | MARK4  |
| 196 | 220502_s_at | SLC13A1 | 207 | 63825_at    | ABHD2  |
| 197 | 220503_at   | SLC13A1 | 208 | 87100_at    | ABHD2  |

---

*NA: Not available. Gene unidentified.*

**Supplementary Table 3: STAT5 Signature: Downregulated genes.**

| Probe          | Gene Symbol | Probe          | Gene Symbol |
|----------------|-------------|----------------|-------------|
| 1 1405_i_at    | CCL5        | 46 203296_s_at | ATP1A2      |
| 2 1431_at      | CYP2E1      | 47 203369_x_at | PDLIM7      |
| 3 200696_s_at  | GSN         | 48 203370_s_at | PDLIM7      |
| 4 200951_s_at  | CCND2       | 49 203408_s_at | SATB1       |
| 5 200952_s_at  | CCND2       | 50 203414_at   | MMD         |
| 6 200953_s_at  | CCND2       | 51 203415_at   | PDCD6       |
| 7 200965_s_at  | ABLIM1      | 52 203440_at   | CDH2        |
| 8 200974_at    | ACTA2       | 53 203441_s_at | CDH2        |
| 9 201495_x_at  | MYH11       | 54 203498_at   | RCAN2       |
| 10 201496_x_at | MYH11       | 55 203547_at   | CD4         |
| 11 201497_x_at | MYH11       | 56 203548_s_at | LPL         |
| 12 201539_s_at | FHL1        | 57 203549_s_at | LPL         |
| 13 201540_at   | FHL1        | 58 203550_s_at | FAM189B     |
| 14 201564_s_at | FSCN1       | 59 203661_s_at | TMOD1       |
| 15 201842_s_at | EFEMP1      | 60 203662_s_at | TMOD1       |
| 16 201843_s_at | EFEMP1      | 61 203666_at   | CXCL12      |
| 17 201925_s_at | CD55        | 62 203697_at   | FRZB        |
| 18 201926_s_at | CD55        | 63 203698_s_at | FRZB        |
| 19 201963_at   | ACSL1       | 64 203716_s_at | DPP4        |
| 20 202222_s_at | DES         | 65 203717_at   | DPP4        |
| 21 202237_at   | NNMT        | 66 203741_s_at | ADCY7       |
| 22 202238_s_at | NNMT        | 67 203861_s_at | ACTN2       |
| 23 202269_x_at | GBP1        | 68 203862_s_at | ACTN2       |
| 24 202270_at   | GBP1        | 69 203863_at   | ACTN2       |
| 25 202377_at   | NA          | 70 203864_s_at | ACTN2       |
| 26 202378_s_at | LEPROT      | 71 203868_s_at | VCAM1       |
| 27 202497_x_at | SLC2A3      | 72 203872_at   | ACTA1       |
| 28 202498_s_at | SLC2A3      | 73 203879_at   | PIK3CD      |
| 29 202499_s_at | SLC2A3      | 74 203887_s_at | THBD        |
| 30 202517_at   | CRMP1       | 75 203888_at   | THBD        |
| 31 202587_s_at | AK1         | 76 203889_at   | SCG5        |
| 32 202588_at   | AK1         | 77 203932_at   | HLA-DMB     |
| 33 202746_at   | ITM2A       | 78 203951_at   | CNN1        |
| 34 202747_s_at | ITM2A       | 79 203979_at   | CYP27A1     |
| 35 202796_at   | SYNPO       | 80 203980_at   | FABP4       |
| 36 202860_at   | DENND4B     | 81 204030_s_at | SCHIP1      |
| 37 203000_at   | STMN2       | 82 204057_at   | IRF8        |
| 38 203001_s_at | STMN2       | 83 204099_at   | SMARCD3     |
| 39 203065_s_at | CAV1        | 84 204116_at   | IL2RG       |
| 40 203066_at   | CHST15      | 85 204118_at   | CD48        |
| 41 203146_s_at | GABBR1      | 86 204154_at   | CDO1        |
| 42 203185_at   | RASSF2      | 87 204165_at   | WASF1       |
| 43 203242_s_at | PDLIM5      | 88 204179_at   | MB          |
| 44 203243_s_at | PDLIM5      | 89 204192_at   | CD37        |
| 45 203295_s_at | ATP1A2      | 90 204217_s_at | RTN2        |

|     |             |         |     |             |          |
|-----|-------------|---------|-----|-------------|----------|
| 91  | 204236_at   | FLI1    | 139 | 204988_at   | FGB      |
| 92  | 204256_at   | ELOVL6  | 140 | 204995_at   | CDK5R1   |
| 93  | 204284_at   | PPP1R3C | 141 | 204996_s_at | CDK5R1   |
| 94  | 204310_s_at | NPR2    | 142 | 204997_at   | GPD1     |
| 95  | 204311_at   | ATP1B2  | 143 | 205013_s_at | ADORA2A  |
| 96  | 204364_s_at | REEP1   | 144 | 205040_at   | ORM1     |
| 97  | 204365_s_at | REEP1   | 145 | 205041_s_at | NA       |
| 98  | 204425_at   | ARHGAP4 | 146 | 205049_s_at | CD79A    |
| 99  | 204472_at   | GEM     | 147 | 205055_at   | ITGAE    |
| 100 | 204482_at   | CLDN5   | 148 | 205082_s_at | AOX1     |
| 101 | 204483_at   | ENO3    | 149 | 205083_at   | AOX1     |
| 102 | 204505_s_at | EPB49   | 150 | 205110_s_at | FGF13    |
| 103 | 204562_at   | IRF4    | 151 | 205163_at   | MYLPF    |
| 104 | 204563_at   | SELL    | 152 | 205177_at   | TNNI1    |
| 105 | 204570_at   | COX7A1  | 153 | 205200_at   | CLEC3B   |
| 106 | 204581_at   | CD22    | 154 | 205214_at   | STK17B   |
| 107 | 204607_at   | HMGCS2  | 155 | 205221_at   | HGD      |
| 108 | 204612_at   | PKIA    | 156 | 205254_x_at | TCF7     |
| 109 | 204631_at   | MYH2    | 157 | 205255_x_at | TCF7     |
| 110 | 204646_at   | DPYD    | 158 | 205257_s_at | AMPH     |
| 111 | 204655_at   | CCL5    | 159 | 205265_s_at | SPEG     |
| 112 | 204667_at   | FOXA1   | 160 | 205267_at   | POU2AF1  |
| 113 | 204674_at   | LRMP    | 161 | 205291_at   | IL2RB    |
| 114 | 204712_at   | WIF1    | 162 | 205297_s_at | CD79B    |
| 115 | 204737_s_at | NA      | 163 | 205306_x_at | KMO      |
| 116 | 204774_at   | EVI2A   | 164 | 205307_s_at | KMO      |
| 117 | 204780_s_at | FAS     | 165 | 205336_at   | PVALB    |
| 118 | 204781_s_at | FAS     | 166 | 205352_at   | SERPINI1 |
| 119 | 204782_at   | MLF1    | 167 | 205374_at   | SLN      |
| 120 | 204783_at   | MLF1    | 168 | 205382_s_at | CFD      |
| 121 | 204784_s_at | MLF1    | 169 | 205384_at   | FXYD1    |
| 122 | 204794_at   | DUSP2   | 170 | 205388_at   | TNNC2    |
| 123 | 204802_at   | RRAD    | 171 | 205389_s_at | ANK1     |
| 124 | 204803_s_at | RRAD    | 172 | 205390_s_at | ANK1     |
| 125 | 204810_s_at | CKM     | 173 | 205391_x_at | ANK1     |
| 126 | 204814_at   | CADPS   | 174 | 205404_at   | HSD11B1  |
| 127 | 204844_at   | ENPEP   | 175 | 205421_at   | SLC22A3  |
| 128 | 204845_s_at | ENPEP   | 176 | 205444_at   | ATP2A1   |
| 129 | 204865_at   | CA3     | 177 | 205450_at   | PHKA1    |
| 130 | 204885_s_at | MSLN    | 178 | 205456_at   | CD3E     |
| 131 | 204888_s_at | NEURL   | 179 | 205478_at   | PPP1R1A  |
| 132 | 204889_s_at | NEURL   | 180 | 205484_at   | SIT1     |
| 133 | 204890_s_at | LCK     | 181 | 205485_at   | RYR1     |
| 134 | 204891_s_at | LCK     | 182 | 205488_at   | GZMA     |
| 135 | 204894_s_at | AOC3    | 183 | 205489_at   | CRYM     |
| 136 | 204948_s_at | FST     | 184 | 205500_at   | C5       |
| 137 | 204963_at   | SSPN    | 185 | 205508_at   | SCN1B    |
| 138 | 204964_s_at | SSPN    | 186 | 205544_s_at | CR2      |

|     |             |          |     |             |          |
|-----|-------------|----------|-----|-------------|----------|
| 187 | 205553_s_at | CSRP3    | 235 | 206106_at   | MAPK12   |
| 188 | 205554_s_at | DNASE1L3 | 236 | 206118_at   | STAT4    |
| 189 | 205589_at   | MYL3     | 237 | 206126_at   | CXCR5    |
| 190 | 205591_at   | OLFM1    | 238 | 206134_at   | ADAMDEC1 |
| 191 | 205599_at   | TRAF1    | 239 | 206150_at   | CD27     |
| 192 | 205600_x_at | HOXB5    | 240 | 206159_at   | GDF10    |
| 193 | 205601_s_at | HOXB5    | 241 | 206160_at   | APOBEC2  |
| 194 | 205604_at   | HOXD9    | 242 | 206181_at   | SLAMF1   |
| 195 | 205605_at   | HOXD9    | 243 | 206186_at   | MPP3     |
| 196 | 205610_at   | MYOM1    | 244 | 206201_s_at | MEOX2    |
| 197 | 205624_at   | CPA3     | 245 | 206202_at   | MEOX2    |
| 198 | 205636_at   | SH3GL3   | 246 | 206204_at   | GRB14    |
| 199 | 205637_s_at | SH3GL3   | 247 | 206208_at   | CA4      |
| 200 | 205651_x_at | RAPGEF4  | 248 | 206209_s_at | CA4      |
| 201 | 205668_at   | LY75     | 249 | 206216_at   | SRPK3    |
| 202 | 205693_at   | TNNT3    | 250 | 206276_at   | LY6D     |
| 203 | 205712_at   | PTPRD    | 251 | 206287_s_at | ITIH4    |
| 204 | 205718_at   | ITGB7    | 252 | 206296_x_at | MAP4K1   |
| 205 | 205728_at   | NA       | 253 | 206304_at   | MYBPH    |
| 206 | 205738_s_at | FABP3    | 254 | 206337_at   | CCR7     |
| 207 | 205741_s_at | DTNA     | 255 | 206341_at   | IL2RA    |
| 208 | 205756_s_at | F8       | 256 | 206344_at   | PON1     |
| 209 | 205758_at   | CD8A     | 257 | 206345_s_at | PON1     |
| 210 | 205766_at   | TCAP     | 258 | 206349_at   | LGI1     |
| 211 | 205794_s_at | NOVA1    | 259 | 206353_at   | COX6A2   |
| 212 | 205798_at   | IL7R     | 260 | 206365_at   | XCL1     |
| 213 | 205808_at   | ASPH     | 261 | 206366_x_at | XCL1     |
| 214 | 205817_at   | SIX1     | 262 | 206372_at   | MYF6     |
| 215 | 205819_at   | MARCO    | 263 | 206375_s_at | HSPB3    |
| 216 | 205826_at   | MYOM2    | 264 | 206393_at   | TNNI2    |
| 217 | 205831_at   | CD2      | 265 | 206398_s_at | CD19     |
| 218 | 205856_at   | SLC14A1  | 266 | 206417_at   | CNGA1    |
| 219 | 205860_x_at | FOLH1    | 267 | 206423_at   | ANGPTL7  |
| 220 | 205861_at   | SPIB     | 268 | 206433_s_at | SPOCK3   |
| 221 | 205872_x_at | PDE4DIP  | 269 | 206434_at   | SPOCK3   |
| 222 | 205876_at   | LIFR     | 270 | 206437_at   | S1PR4    |
| 223 | 205892_s_at | FABP1    | 271 | 206453_s_at | NDRG2    |
| 224 | 205911_at   | PTH1R    | 272 | 206457_s_at | DIO1     |
| 225 | 205923_at   | RELN     | 273 | 206470_at   | PLXNC1   |
| 226 | 205926_at   | IL27RA   | 274 | 206471_s_at | PLXNC1   |
| 227 | 205942_s_at | ACSM3    | 275 | 206485_at   | CD5      |
| 228 | 205951_at   | MYH1     | 276 | 206488_s_at | CD36     |
| 229 | 205952_at   | KCNK3    | 277 | 206527_at   | ABAT     |
| 230 | 205960_at   | PDK4     | 278 | 206545_at   | CD28     |
| 231 | 205983_at   | DPEP1    | 279 | 206574_s_at | PTP4A3   |
| 232 | 206046_at   | ADAM23   | 280 | 206586_at   | CNR2     |
| 233 | 206060_s_at | PTPN22   | 281 | 206589_at   | GFI1     |
| 234 | 206104_at   | ISL1     | 282 | 206612_at   | CACNG1   |



|     |             |          |     |             |           |
|-----|-------------|----------|-----|-------------|-----------|
| 283 | 206618_at   | IL18R1   | 331 | 207349_s_at | UCP3      |
| 284 | 206630_at   | TYR      | 332 | 207351_s_at | SH2D2A    |
| 285 | 206641_at   | TNFRSF17 | 333 | 207373_at   | HOXD10    |
| 286 | 206656_s_at | C20orf3  | 334 | 207437_at   | NOVA1     |
| 287 | 206657_s_at | MYOD1    | 335 | 207445_s_at | CCR9      |
| 288 | 206693_at   | IL7      | 336 | 207453_s_at | DNAJB5    |
| 289 | 206717_at   | MYH8     | 337 | 207460_at   | GZMM      |
| 290 | 206759_at   | FCER2    | 338 | 207521_s_at | ATP2A3    |
| 291 | 206760_s_at | FCER2    | 339 | 207522_s_at | ATP2A3    |
| 292 | 206761_at   | CD96     | 340 | 207526_s_at | IL1RL1    |
| 293 | 206762_at   | KCNA5    | 341 | 207554_x_at | TBXA2R    |
| 294 | 206804_at   | CD3G     | 342 | 207555_s_at | TBXA2R    |
| 295 | 206805_at   | SEMA3A   | 343 | 207558_s_at | PITX2     |
| 296 | 206812_at   | ADRB3    | 344 | 207583_at   | ABCD2     |
| 297 | 206833_s_at | ACYP2    | 345 | 207641_at   | TNFRSF13B |
| 298 | 206887_at   | CCBP2    | 346 | 207662_at   | TBX1      |
| 299 | 206908_s_at | CLDN11   | 347 | 207681_at   | CXCR3     |
| 300 | 206909_at   | NA       | 348 | 207726_at   | ESRRB     |
| 301 | 206914_at   | CRTAM    | 349 | 207761_s_at | METTL7A   |
| 302 | 206955_at   | AQP7     | 350 | 207819_s_at | ABCB4     |
| 303 | 206974_at   | CXCR6    | 351 | 207849_at   | IL2       |
| 304 | 206975_at   | LTA      | 352 | 207861_at   | CCL22     |
| 305 | 206980_s_at | FLT3LG   | 353 | 207897_at   | CRHR2     |
| 306 | 206996_x_at | CACNB1   | 354 | 207902_at   | IL5RA     |
| 307 | 207034_s_at | GLI2     | 355 | 207919_at   | ART1      |
| 308 | 207050_at   | CACNA2D1 | 356 | 207957_s_at | PRKCB     |
| 309 | 207066_at   | HRC      | 357 | 207961_x_at | MYH11     |
| 310 | 207087_x_at | ANK1     | 358 | 207977_s_at | DPT       |
| 311 | 207089_at   | NRAP     | 359 | 207979_s_at | CD8B      |
| 312 | 207092_at   | LEP      | 360 | 208010_s_at | PTPN22    |
| 313 | 207103_at   | KCND2    | 361 | 208011_at   | PTPN22    |
| 314 | 207110_at   | KCNJ12   | 362 | 208056_s_at | CBFA2T3   |
| 315 | 207144_s_at | CITED1   | 363 | 208057_s_at | GLI2      |
| 316 | 207148_x_at | MYOZ2    | 364 | 208078_s_at | NA        |
| 317 | 207175_at   | ADIPOQ   | 365 | 208116_s_at | MAN1A1    |
| 318 | 207184_at   | SLC6A13  | 366 | 208148_at   | MYH4      |
| 319 | 207238_s_at | PTPRC    | 367 | 208169_s_at | PTGER3    |
| 320 | 207249_s_at | SLC28A2  | 368 | 208186_s_at | LIPE      |
| 321 | 207274_at   | CHRNE    | 369 | 208204_s_at | CAV3      |
| 322 | 207275_s_at | ACSL1    | 370 | 208206_s_at | RASGRP2   |
| 323 | 207282_s_at | MYOG     | 371 | 208213_s_at | KCNAB1    |
| 324 | 207284_s_at | ASPH     | 372 | 208251_at   | KCNC4     |
| 325 | 207302_at   | SGCG     | 373 | 208352_x_at | ANK1      |
| 326 | 207312_at   | PHKG1    | 374 | 208353_x_at | ANK1      |
| 327 | 207317_s_at | CASQ2    | 375 | 208380_at   | LBX1      |
| 328 | 207323_s_at | MBP      | 376 | 208383_s_at | PCK1      |
| 329 | 207339_s_at | LTB      | 377 | 208406_s_at | GRAP2     |
| 330 | 207345_at   | FST      | 378 | 208408_at   | PTN       |

|     |             |         |     |             |         |
|-----|-------------|---------|-----|-------------|---------|
| 379 | 208414_s_at | HOXB3   | 427 | 209975_at   | CYP2E1  |
| 380 | 208430_s_at | DTNA    | 428 | 209976_s_at | CYP2E1  |
| 381 | 208481_at   | ASB4    | 429 | 210031_at   | CD247   |
| 382 | 208510_s_at | PPARG   | 430 | 210038_at   | PRKCCQ  |
| 383 | 208522_s_at | PTCH1   | 431 | 210039_s_at | PRKCCQ  |
| 384 | 208534_s_at | NA      | 432 | 210051_at   | RAPGEF3 |
| 385 | 208568_at   | MC2R    | 433 | 210055_at   | TSHR    |
| 386 | 208602_x_at | CD6     | 434 | 210066_s_at | AQP4    |
| 387 | 208789_at   | PTRF    | 435 | 210067_at   | AQP4    |
| 388 | 208790_s_at | PTRF    | 436 | 210068_s_at | AQP4    |
| 389 | 208813_at   | GOT1    | 437 | 210069_at   | NA      |
| 390 | 209072_at   | MBP     | 438 | 210070_s_at | NA      |
| 391 | 209083_at   | CORO1A  | 439 | 210072_at   | CCL19   |
| 392 | 209135_at   | ASPH    | 440 | 210078_s_at | KCNAB1  |
| 393 | 209234_at   | KIF1B   | 441 | 210079_x_at | KCNAB1  |
| 394 | 209291_at   | ID4     | 442 | 210090_at   | ARC     |
| 395 | 209292_at   | ID4     | 443 | 210091_s_at | DTNA    |
| 396 | 209293_x_at | ID4     | 444 | 210096_at   | CYP4B1  |
| 397 | 209392_at   | ENPP2   | 445 | 210116_at   | SH2D1A  |
| 398 | 209459_s_at | ABAT    | 446 | 210121_at   | B3GALT2 |
| 399 | 209460_at   | ABAT    | 447 | 210136_at   | MBP     |
| 400 | 209465_x_at | PTN     | 448 | 210140_at   | CST7    |
| 401 | 209466_x_at | PTN     | 449 | 210147_at   | ART3    |
| 402 | 209469_at   | GPM6A   | 450 | 210155_at   | MYOC    |
| 403 | 209470_s_at | GPM6A   | 451 | 210168_at   | C6      |
| 404 | 209524_at   | HDGFRP3 | 452 | 210176_at   | TLR1    |
| 405 | 209525_at   | HDGFRP3 | 453 | 210185_at   | CACNB1  |
| 406 | 209526_s_at | HDGFRP3 | 454 | 210189_at   | HSPA1L  |
| 407 | 209550_at   | NDN     | 455 | 210198_s_at | PLP1    |
| 408 | 209554_at   | CD36    | 456 | 210298_x_at | FHL1    |
| 409 | 209555_s_at | CD36    | 457 | 210299_s_at | FHL1    |
| 410 | 209568_s_at | RGL1    | 458 | 210305_at   | PDE4DIP |
| 411 | 209685_s_at | PRKCB   | 459 | 210356_x_at | MS4A1   |
| 412 | 209687_at   | CXCL12  | 460 | 210370_s_at | LY9     |
| 413 | 209695_at   | PTP4A3  | 461 | 210374_x_at | PTGER3  |
| 414 | 209700_x_at | PDE4DIP | 462 | 210375_at   | PTGER3  |
| 415 | 209703_x_at | METTL7A | 463 | 210377_at   | ACSM3   |
| 416 | 209721_s_at | IFFO1   | 464 | 210439_at   | ICOS    |
| 417 | 209742_s_at | MYL2    | 465 | 210442_at   | IL1RL1  |
| 418 | 209815_at   | PTCH1   | 466 | 210448_s_at | P2RX5   |
| 419 | 209816_at   | PTCH1   | 467 | 210461_s_at | ABLIM1  |
| 420 | 209827_s_at | IL16    | 468 | 210471_s_at | KCNAB1  |
| 421 | 209828_s_at | IL16    | 469 | 210550_s_at | RASGRF1 |
| 422 | 209877_at   | SNCG    | 470 | 210607_at   | FLT3LG  |
| 423 | 209888_s_at | MYL1    | 471 | 210611_s_at | DTNA    |
| 424 | 209904_at   | TNNC1   | 472 | 210632_s_at | SGCA    |
| 425 | 209905_at   | HOXA9   | 473 | 210643_at   | TNFSF11 |
| 426 | 209928_s_at | MSC     | 474 | 210727_at   | CALCA   |

|     |             |         |     |             |         |
|-----|-------------|---------|-----|-------------|---------|
| 475 | 210728_s_at | CALCA   | 523 | 211681_s_at | PDLIM5  |
| 476 | 210736_x_at | DTNA    | 524 | 211737_x_at | PTN     |
| 477 | 210744_s_at | IL5RA   | 525 | 211751_at   | PDE4DIP |
| 478 | 210786_s_at | FLI1    | 526 | 211856_x_at | CD28    |
| 479 | 210831_s_at | PTGER3  | 527 | 211861_x_at | CD28    |
| 480 | 210832_x_at | PTGER3  | 528 | 211893_x_at | CD6     |
| 481 | 210833_at   | PTGER3  | 529 | 211900_x_at | CD6     |
| 482 | 210834_s_at | PTGER3  | 530 | 211909_x_at | PTGER3  |
| 483 | 210839_s_at | ENPP2   | 531 | 211986_at   | AHNAK   |
| 484 | 210865_at   | FASLG   | 532 | 212097_at   | CAV1    |
| 485 | 210868_s_at | ELOVL6  | 533 | 212224_at   | ALDH1A1 |
| 486 | 210875_s_at | ZEB1    | 534 | 212390_at   | PDE4DIP |
| 487 | 210887_s_at | EVC     | 535 | 212392_s_at | PDE4DIP |
| 488 | 210896_s_at | ASPH    | 536 | 212412_at   | PDLIM5  |
| 489 | 210906_x_at | AQP4    | 537 | 212551_at   | CAP2    |
| 490 | 210924_at   | OLFM1   | 538 | 212554_at   | CAP2    |
| 491 | 210942_s_at | ST3GAL6 | 539 | 212587_s_at | PTPRC   |
| 492 | 210948_s_at | LEF1    | 540 | 212588_at   | PTPRC   |
| 493 | 210967_x_at | CACNB1  | 541 | 212592_at   | IGJ     |
| 494 | 210976_s_at | PFKM    | 542 | 212624_s_at | CHN1    |
| 495 | 211138_s_at | KMO     | 543 | 212627_s_at | NA      |
| 496 | 211153_s_at | TNFSF11 | 544 | 212706_at   | RASA4   |
| 497 | 211197_s_at | ICOSLG  | 545 | 212707_s_at | NA      |
| 498 | 211198_s_at | ICOSLG  | 546 | 212758_s_at | ZEB1    |
| 499 | 211199_s_at | ICOSLG  | 547 | 212764_at   | ZEB1    |
| 500 | 211203_s_at | CNTN1   | 548 | 212813_at   | JAM3    |
| 501 | 211207_s_at | ACSL6   | 549 | 212817_at   | DNAJB5  |
| 502 | 211209_x_at | SH2D1A  | 550 | 212873_at   | HMHA1   |
| 503 | 211210_x_at | SH2D1A  | 551 | 213036_x_at | ATP2A3  |
| 504 | 211211_x_at | SH2D1A  | 552 | 213042_s_at | ATP2A3  |
| 505 | 211230_s_at | PIK3CD  | 553 | 213068_at   | DPT     |
| 506 | 211265_at   | PTGER3  | 554 | 213071_at   | DPT     |
| 507 | 211269_s_at | IL2RA   | 555 | 213096_at   | TMCC2   |
| 508 | 211273_s_at | TBX1    | 556 | 213131_at   | OLFM1   |
| 509 | 211274_at   | TBX1    | 557 | 213160_at   | DOCK2   |
| 510 | 211333_s_at | FASLG   | 558 | 213161_at   | TSTD2   |
| 511 | 211339_s_at | ITK     | 559 | 213197_at   | ASTN1   |
| 512 | 211424_x_at | METTL7A | 560 | 213201_s_at | TNNT1   |
| 513 | 211469_s_at | CXCR6   | 561 | 213241_at   | PLXNC1  |
| 514 | 211476_at   | MYOZ2   | 562 | 213262_at   | SACS    |
| 515 | 211478_s_at | DPP4    | 563 | 213332_at   | PAPPA2  |
| 516 | 211493_x_at | DTNA    | 564 | 213335_s_at | ST3GAL6 |
| 517 | 211510_s_at | CRHR2   | 565 | 213355_at   | ST3GAL6 |
| 518 | 211516_at   | IL5RA   | 566 | 213362_at   | PTPRD   |
| 519 | 211517_s_at | IL5RA   | 567 | 213371_at   | LDB3    |
| 520 | 211565_at   | SH3GL3  | 568 | 213388_at   | PDE4DIP |
| 521 | 211590_x_at | TBXA2R  | 569 | 213450_s_at | ICOSLG  |
| 522 | 211677_x_at | CADM3   | 570 | 213539_at   | CD3D    |

|     |             |         |     |             |          |
|-----|-------------|---------|-----|-------------|----------|
| 571 | 213648_at   | NA      | 619 | 214914_at   | FAM13C   |
| 572 | 213669_at   | FCHO1   | 620 | 215027_at   | RAPGEF3  |
| 573 | 213683_at   | ACSL6   | 621 | 215100_at   | C6orf105 |
| 574 | 213684_s_at | PDLIM5  | 622 | 215332_s_at | CD8B     |
| 575 | 213706_at   | GPD1    | 623 | 215352_at   | GIMAP5   |
| 576 | 213717_at   | LDB3    | 624 | 215363_x_at | FOLH1    |
| 577 | 213782_s_at | MYOZ2   | 625 | 215442_s_at | TSHR     |
| 578 | 213791_at   | PENK    | 626 | 215443_at   | TSHR     |
| 579 | 213855_s_at | LIPE    | 627 | 215501_s_at | DUSP10   |
| 580 | 213915_at   | NKG7    | 628 | 215575_at   | PDE4DIP  |
| 581 | 213933_at   | PTGER3  | 629 | 215688_at   | RASGRF1  |
| 582 | 213948_x_at | CADM3   | 630 | 215719_x_at | FAS      |
| 583 | 213953_at   | KRT20   | 631 | 215785_s_at | CYFIP2   |
| 584 | 213958_at   | CD6     | 632 | 215787_at   | ACTA2    |
| 585 | 214032_at   | ZAP70   | 633 | 215967_s_at | LY9      |
| 586 | 214040_s_at | GSN     | 634 | 216236_s_at | NA       |
| 587 | 214043_at   | PTPRD   | 635 | 216238_s_at | FGB      |
| 588 | 214049_x_at | CD7     | 636 | 216252_x_at | FAS      |
| 589 | 214066_x_at | NPR2    | 637 | 216265_x_at | MYH7     |
| 590 | 214099_s_at | PDE4DIP | 638 | 216409_at   | ACSL6    |
| 591 | 214121_x_at | PDLIM7  | 639 | 216424_at   | CD4      |
| 592 | 214122_at   | PDLIM7  | 640 | 216432_at   | SLC28A2  |
| 593 | 214129_at   | PDE4DIP | 641 | 216567_at   | NA       |
| 594 | 214130_s_at | PDE4DIP | 642 | 216693_x_at | HDGFRP3  |
| 595 | 214158_s_at | NA      | 643 | 216734_s_at | CXCR5    |
| 596 | 214219_x_at | MAP4K1  | 644 | 216803_at   | PDLIM5   |
| 597 | 214246_x_at | MINK1   | 645 | 216804_s_at | PDLIM5   |
| 598 | 214266_s_at | PDLIM7  | 646 | 216887_s_at | LDB3     |
| 599 | 214278_s_at | NDRG2   | 647 | 216888_at   | LDB3     |
| 600 | 214279_s_at | NDRG2   | 648 | 216947_at   | DES      |
| 601 | 214285_at   | FABP3   | 649 | 216986_s_at | IRF4     |
| 602 | 214307_at   | HGD     | 650 | 216987_at   | IRF4     |
| 603 | 214308_s_at | HGD     | 651 | 217062_at   | DMPK     |
| 604 | 214339_s_at | MAP4K1  | 652 | 217066_s_at | DMPK     |
| 605 | 214367_at   | RASGRP2 | 653 | 217081_at   | OR2H2    |
| 606 | 214368_at   | RASGRP2 | 654 | 217119_s_at | CXCR3    |
| 607 | 214369_s_at | RASGRP2 | 655 | 217147_s_at | TRAT1    |
| 608 | 214450_at   | CTSW    | 656 | 217228_s_at | ASB4     |
| 609 | 214505_s_at | FHL1    | 657 | 217229_at   | ASB4     |
| 610 | 214506_at   | GPR182  | 658 | 217303_s_at | ADRB3    |
| 611 | 214551_s_at | CD7     | 659 | 217418_x_at | MS4A1    |
| 612 | 214584_x_at | ACACB   | 660 | 217422_s_at | CD22     |
| 613 | 214601_at   | TPH1    | 661 | 217425_at   | MC2R     |
| 614 | 214608_s_at | EYA1    | 662 | 217434_at   | MC2R     |
| 615 | 214621_at   | GYS2    | 663 | 217452_s_at | B3GALT2  |
| 616 | 214651_s_at | HOXA9   | 664 | 217483_at   | FOLH1    |
| 617 | 214761_at   | ZNF423  | 665 | 217487_x_at | FOLH1    |
| 618 | 214846_s_at | ALPK3   | 666 | 217495_x_at | CALCA    |

|     |             |          |     |             |            |
|-----|-------------|----------|-----|-------------|------------|
| 667 | 217561_at   | CALCA    | 715 | 220037_s_at | LYVE1      |
| 668 | 217702_at   | IL27RA   | 716 | 220048_at   | EDAR       |
| 669 | 218168_s_at | CABC1    | 717 | 220059_at   | STAP1      |
| 670 | 218376_s_at | MICAL1   | 718 | 220131_at   | FXYD7      |
| 671 | 218550_s_at | LRRC20   | 719 | 220144_s_at | ANKRD5     |
| 672 | 218623_at   | HMP19    | 720 | 220161_s_at | EPB41L4B   |
| 673 | 218711_s_at | SDPR     | 721 | 220284_at   | DKKL1      |
| 674 | 218723_s_at | C13orf15 | 722 | 220330_s_at | SAMSN1     |
| 675 | 218730_s_at | OGN      | 723 | 220338_at   | RALGPS2    |
| 676 | 218805_at   | GIMAP5   | 724 | 220395_at   | DNAJA4     |
| 677 | 218825_at   | EGFL7    | 725 | 220423_at   | PLA2G2D    |
| 678 | 218865_at   | MOSC1    | 726 | 220484_at   | MCOLN3     |
| 679 | 218934_s_at | HSPB7    | 727 | 220556_at   | ATP1B4     |
| 680 | 219059_s_at | LYVE1    | 728 | 220558_x_at | TSPAN32    |
| 681 | 219064_at   | ITIH5    | 729 | 220570_at   | RETN       |
| 682 | 219139_s_at | CROCCL2  | 730 | 220613_s_at | SYTL2      |
| 683 | 219140_s_at | RBP4     | 731 | 220675_s_at | PNPLA3     |
| 684 | 219196_at   | SCG3     | 732 | 220684_at   | TBX21      |
| 685 | 219230_at   | TMEM100  | 733 | 220786_s_at | SLC38A4    |
| 686 | 219256_s_at | SH3TC1   | 734 | 220868_s_at | SLC7A10    |
| 687 | 219371_s_at | KLF2     | 735 | 220979_s_at | ST6GALNAC5 |
| 688 | 219432_at   | EVC      | 736 | 220984_s_at | SLCO5A1    |
| 689 | 219438_at   | NKAIN1   | 737 | 221009_s_at | ANGPTL4    |
| 690 | 219440_at   | RAI2     | 738 | 221163_s_at | MLXIPL     |
| 691 | 219464_at   | CA14     | 739 | 221217_s_at | A2BP1      |
| 692 | 219478_at   | WFDC1    | 740 | 221232_s_at | ANKRD2     |
| 693 | 219500_at   | CLCF1    | 741 | 221279_at   | GDAP1      |
| 694 | 219509_at   | MYOZ1    | 742 | 221295_at   | CIDEA      |
| 695 | 219645_at   | CASQ1    | 743 | 221302_at   | KLF15      |
| 696 | 219647_at   | POPDC2   | 744 | 221310_at   | FGF14      |
| 697 | 219655_at   | C7orf10  | 745 | 221331_x_at | CTLA4      |
| 698 | 219666_at   | MS4A6A   | 746 | 221345_at   | FFAR2      |
| 699 | 219728_at   | MYOT     | 747 | 221350_at   | HOXC8      |
| 700 | 219772_s_at | SMPX     | 748 | 221368_at   | NEU2       |
| 701 | 219777_at   | GIMAP6   | 749 | 221384_at   | UCP1       |
| 702 | 219803_at   | ANGPTL3  | 750 | 221417_x_at | S1PR5      |
| 703 | 219827_at   | UCP3     | 751 | 221424_s_at | OR51E2     |
| 704 | 219829_at   | ITGB1BP2 | 752 | 221523_s_at | RRAGD      |
| 705 | 219841_at   | AICDA    | 753 | 221524_s_at | RRAGD      |
| 706 | 219944_at   | CLIP4    | 754 | 221557_s_at | LEF1       |
| 707 | 219949_at   | LRRC2    | 755 | 221558_s_at | LEF1       |
| 708 | 219963_at   | DUSP13   | 756 | 221563_at   | DUSP10     |
| 709 | 219971_at   | IL21R    | 757 | 221658_s_at | IL21R      |
| 710 | 219983_at   | HRASLS   | 758 | 221667_s_at | HSPB8      |
| 711 | 219984_s_at | HRASLS   | 759 | 221755_at   | EHBP1L1    |
| 712 | 219993_at   | SOX17    | 760 | 221760_at   | MAN1A1     |
| 713 | 220016_at   | AHNAK    | 761 | 221921_s_at | CADM3      |
| 714 | 220027_s_at | RASIP1   | 762 | 221928_at   | ACACB      |

|     |             |         |     |            |         |
|-----|-------------|---------|-----|------------|---------|
| 763 | 221976_s_at | HDGFRP3 | 774 | 34408_at   | RTN2    |
| 764 | 221994_at   | PDLIM5  | 775 | 34471_at   | MYH8    |
| 765 | 222049_s_at | RBP4    | 776 | 35974_at   | LRMP    |
| 766 | 222062_at   | IL27RA  | 777 | 36030_at   | IFFO1   |
| 767 | 222100_at   | CYP2E1  | 778 | 37201_at   | ITIH4   |
| 768 | 222152_at   | PDCD6   | 779 | 37996_s_at | DMPK    |
| 769 | 222259_s_at | SPO11   | 780 | 38521_at   | CD22    |
| 770 | 222379_at   | KCNE4   | 781 | 43427_at   | ACACB   |
| 771 | 222380_s_at | PDCD6   | 782 | 49452_at   | ACACB   |
| 772 | 222381_at   | PDCD6   | 783 | 64064_at   | GIMAP5  |
| 773 | 336_at      | TBXA2R  | 784 | 91703_at   | EHBP1L1 |

---

*NA: Not available. Gene unidentified.*

**Supplementary Table 4: Receptor status and gene signature status in breast cancer metastasis.**

| Tumor IDs | Metastatic Site | Receptors    |              |             | Signatures |       |
|-----------|-----------------|--------------|--------------|-------------|------------|-------|
|           |                 | ER           | PR           | ERBB2       | TNC        | STAT5 |
| 113471T   | Brain           | -1.830751357 | -3.17239816  | 2.06085951  | 0          | 1     |
| 116610T   | Brain           | -1.465143132 | -3.248642051 | 3.317778651 | 0          | 1     |
| 112403T   | Brain           | -1.288143474 | -3.176511661 | 1.263059326 | 0          | 1     |
| 12370T    | Brain           | -1.235059344 | -3.111259873 | 6.339716917 | 0          | 1     |
| 107961T   | Bone            | -1.23346411  | -3.322369986 | 3.053930921 | 0          | 1     |
| 110312T   | Brain           | -1.16329586  | -3.250422845 | 3.673912523 | 0          | 1     |
| 111276T   | Brain           | -1.050693531 | -3.433069353 | 6.345161274 | 0          | 1     |
| 107696T   | Bone            | -0.942358662 | -3.119192641 | 2.890295983 | 0          | 1     |
| 102962T   | Brain           | -0.872675877 | -2.734203355 | 1.972878774 | 0          | 1     |
| 11993T    | Lung            | -0.821297926 | -3.275658113 | 2.703537912 | 1          | 1     |
| 5381T     | Lung            | -0.742084304 | -2.708174014 | 2.072593023 | 0          | 0     |
| 15112T    | Lung            | -0.688731497 | -2.732951633 | 6.370184109 | 0          | 0     |
| 109506T   | Brain           | -0.672496225 | -2.669442367 | 3.023367078 | 0          | 1     |
| 113542T   | Brain           | -0.527455573 | -3.473189186 | 3.458361567 | 0          | 1     |
| 109734T   | Brain           | -0.494866008 | -2.075077793 | 3.763338048 | 0          | 0     |
| B41-Met   | Liver           | -0.470886076 | -2.090127649 | 6.57132669  | 0          | 0     |
| 101258T   | Lung            | -0.374109907 | -2.190499033 | 1.07473238  | 0          | 0     |
| 1813T     | Lung            | -0.268767035 | -2.194972009 | 2.185112498 | 1          | 0     |
| 103696T   | Lung            | -0.188181235 | -2.136521739 | 1.183187552 | 1          | 0     |
| 106570T   | Lung            | -0.157656362 | -1.918140845 | 2.778338028 | 1          | 0     |
| 106201T   | Lung            | -0.148477205 | -2.188903545 | 2.369829554 | 1          | 0     |
| 14191T    | Ovary           | -0.138033708 | -2.1         | 5.072197183 | 1          | 0     |
| 3878T     | Bone            | -0.128077476 | -2.097221936 | 1.638004213 | 1          | 0     |
| B36-Met   | Ovary           | -0.039341404 | -2.061485178 | 4.920805732 | 1          | 0     |
| 104406T   | Brain           | 0.154168447  | -3.278782587 | 6.698444624 | 0          | 1     |
| 109714T   | Brain           | 0.172369845  | -2.699774892 | 3.655078724 | 0          | 1     |
| 14045T    | Lung            | 0.218135593  | -2.11887165  | 3.391685393 | 1          | 0     |
| 7130T     | Lung            | 0.265929347  | -2.144654065 | 1.978642523 | 1          | 0     |
| 12749T    | Liver           | 0.266929856  | -2.176015723 | 2.310282207 | 1          | 0     |
| 6752T     | Bone            | 0.506393211  | -2.306995769 | 1.735280899 | 1          | 0     |
| 11887T    | Bone            | 1.503309862  | -2.593781328 | 2.105800257 | 1          | 1     |
| 115463T   | Bone            | 1.535921208  | -2.932140219 | 5.852007454 | 1          | 1     |
| 112282T   | Bone            | 1.704327937  | -3.207715602 | 6.018694417 | 1          | 1     |
| 6565T     | Lung            | 1.769830986  | -1.786909091 | 5.401527581 | 1          | 0     |
| 4059T     | Lung            | 1.917548954  | -1.146846374 | 2.125032742 | 1          | 0     |
| 14891T    | Bone            | 2.002164861  | -2.79892194  | 5.476565214 | 0          | 0     |
| 14568T    | Brain           | 2.123872649  | -3.220393601 | 6.387693777 | 0          | 1     |
| 10519T    | Lung            | 2.146201055  | -1.995617188 | 2.560816901 | 1          | 0     |
| B35-Met   | Lung            | 2.59665347   | -2.070533275 | 2.845413745 | 1          | 0     |
| 105880T   | Bone            | 2.768450704  | -2.164498835 | 5.307108286 | 1          | 0     |
| B22-Met   | Lung            | 2.926370931  | -2.110081909 | 2.873069012 | 1          | 0     |
| 107426T   | Brain           | 3.114548997  | -2.005714286 | 3.351844772 | 1          | 0     |
| B21-Met   | Ovary           | 3.588766245  | -2.131835522 | 1.759943662 | 1          | 0     |
| B37-Met   | Ovary           | 3.713017977  | -1.82125003  | 2.539745763 | 1          | 0     |
| 107502T   | Brain           | 3.761136592  | -3.269476049 | 7.00963764  | 0          | 1     |

|         |            |             |              |             |   |   |
|---------|------------|-------------|--------------|-------------|---|---|
| 13685T  | Brain      | 3.794888619 | -3.11259259  | 6.224959953 | 0 | 1 |
| B38-Met | Ovary      | 3.829549296 | -2.070394524 | 1.861007921 | 1 | 0 |
| 12740T  | Lung       | 3.939493671 | -2.21164557  | 6.021380282 | 1 | 0 |
| B19-Met | Duodenum   | 3.9518529   | -2.172040177 | 2.442602546 | 1 | 0 |
| 3032T   | Liver      | 3.954957351 | -2.198040087 | 6.336854131 | 1 | 0 |
| 101815T | Liver      | 4.219943344 | -2.00709883  | 2.567130444 | 1 | 0 |
| B34-Met | Lung       | 4.384902127 | -1.502873239 | 2.626356926 | 1 | 0 |
| 112397T | Bone       | 4.403113352 | -3.197712927 | 4.494674639 | 1 | 1 |
| 105079T | Bone       | 4.411933116 | -3.337418304 | 5.455428668 | 1 | 1 |
| 106389T | Liver      | 4.521383902 | -1.376276446 | 3.10129143  | 1 | 0 |
| B20-Met | Ovary      | 4.547722611 | 1.601943381  | 2.448458945 | 1 | 0 |
| 107482T | Bone       | 4.557931533 | -2.179002159 | 3.465067577 | 1 | 0 |
| 109594T | Bone       | 4.581710522 | -2.515236031 | 3.040890255 | 1 | 0 |
| 100184T | Brain      | 4.610466405 | -2.032612899 | 2.421881045 | 1 | 0 |
| 3087T   | Ovary      | 4.752609309 | -1.487288136 | 2.579579243 | 1 | 0 |
| B40-Met | Chest Wall | 4.854606525 | -1.91385325  | 3.613367089 | 1 | 0 |
| 114112T | Bone       | 5.125350984 | 0.468192084  | 2.771693091 | 1 | 1 |
| 12367T  | Bone       | 5.292417238 | -2.097905476 | 2.478227848 | 1 | 0 |
| B39-Met | Bone       | 5.464486503 | 0.691028303  | 3.193383447 | 1 | 0 |
| 105188T | Brain      | 5.866685034 | -1.627681366 | 3.52997155  | 1 | 0 |
| 110032T | Brain      | 6.035894554 | -3.245044556 | 3.005472886 | 0 | 1 |
| 110783T | Lung       | 6.146083054 | -2.816013137 | 3.397398358 | 1 | 1 |

*Red: Positive. Green: Negative.*
